# Supplementary material for: Dose Response, Dosimetric, and Metabolic Evaluations of Replacement PFAS Perfluoro-(2,5,8-trimethyl-3,6,9-trioxadodecanoic) Acid (HFPO-TeA)
Source: MDPI journal article supplement (doi:10.3390/toxics11120951), 2023-11-22
Supplement: s1 [file s1]

# Dose-Response, Dosimetric, and Metabolic Evaluations of Replacement PFAS Perfluoro-(2,5,8-trimethyl-3,6,9-trioxadodecanoic) acid (HFPO-TeA)

Aero Renyer, Krishna Ravindra, Barbara A. Wetmore, Jermaine L. Ford, Michael DeVito, Michael F. Hughes, Leah C. Wehmas, and Denise K. MacMillan

## Supporting Information

### Supporting Text S1: Chemicals

Chemicals used for solvent and mobile phases include methanol (MeOH), water (H<sub>2</sub>O), and acetonitrile (ACN) which were LC/MS grade and purchased from Honeywell Burdick & Jackson (Charlotte, NC, USA). Ethanol (EtOH) used as a solvent was ACS grade and purchased from Honeywell Burdick & Jackson. Ammonium formate (BioUltra purity) and ammonium acetate (99% pure) were used as mobile phase additives and obtained from Millipore Sigma (St. Louis, MO, USA). Formic acid (FA; 97.5% pure) was also used as an additive; it was purchased from Honeywell Fluka (Charlotte, NC, USA). Detailed information for chemicals used for each analysis may be found in Table S1.

### Supporting Text S2: Thyroid Hormone Chemicals and Analysis

3,3',5-Triiodothyronine (Chemical Abstract Service Registry Number (CASRN) 6893-02-3 | U.S. Environmental Protection Agency (U.S. EPA) Distributed Structure-Searchable Toxicity (DSSTox) substance identifier (DTXSID) DTXSID8023216 | T3; > 99% pure), mass-labeled 3,3',5-triiodothyronine hydrochloride (<sup>13</sup>C<sub>6</sub>-T3; > 98% pure), 3,3',5'-triiodothyronine (CASRN 5817-39-0 | DTXSID3046908 | rT3; > 98% pure), mass-labeled 3,3',5'-triiodothyronine hydrochloride (<sup>13</sup>C<sub>6</sub>-rT3; > 99% pure), L-thyroxine (CASRN 300-30-1 | DTXSID0023662 | T4; > 98% pure), and mass-labeled L-thyroxine (<sup>13</sup>C<sub>6</sub>-T4; > 98% pure) were purchased from Cerilliant Corporation (Round Rock, Texas, USA).

Briefly, a 20 µL aliquot of plasma from each sample was loaded into individual wells of a 96-well collection plate. They were spiked with 5 µL of a 40 ng/mL <sup>13</sup>C<sub>6</sub>-T3, <sup>13</sup>C<sub>6</sub>-rT3 and <sup>13</sup>C<sub>6</sub>-T4 mixed solution followed by 1N hydrochloric acid (HCl) (20 µL) (36.5-38%, Fisher Scientific, Waltham, MA, USA), H<sub>2</sub>O (100 µL), and a 50:50 H<sub>2</sub>O/ACN solution (vol/vol) (60 µL) containing 0.1% formic acid (FA). Samples were vortexed, incubated at 37 °C for 2 hours, and brought to room temperature. They were diluted with an aqueous 0.1% acetic acid solution (LC/MS grade, Honeywell Fluka) and vortexed. The SPE well plates (Evolute CX, 96-well SPE plate, 10 mg, 1 mL, Biotage, Charlotte, NC, USA), processed with a positive pressure manifold, were conditioned with methanol followed by an aqueous 0.1% acetic acid solution prior to sample loading with low pressure. Plate wells were washed with 0.1% acetic acid followed by methanol. Thyroid hormones were eluted into a collection plate with 2.5% ammonium hydroxide (NH<sub>4</sub>OH) (28-30%, Thermo Fisher Scientific, Waltham, MA, USA) in methanol. Extracts were then evaporated to dryness with nitrogen using a Turbovap (Biotage) then reconstituted in 100 µL of 25:75 ACN/H<sub>2</sub>O (vol/vol) with 0.1% acetic acid. Extracts were stored in amber micro-sampling vials (Agilent Technologies, Santa Clara, CA, USA) prior to instrumental analysis.

Samples were quantitated against matrix-matched calibration curves containing a minimum of 5 points spanning the range 0.005 – 25.00 ng/mL. Calibration standards were made by combining T3, rT3, and T4 analytes with the <sup>13</sup>C<sub>6</sub>-T3, <sup>13</sup>C<sub>6</sub>-rT3, and <sup>13</sup>C<sub>6</sub>-T4 internal standards then with commercial rat plasma. The standards were extracted using the above procedure. Calibration curves had a quadratic fit with a correlation coefficient ≥ 0.995. Matrix blanks were analyzed with each sample set and were below the limit of quantitation, 0.005 ng/mL plasma.

### Supporting Text S3: *In Vivo* Statistics

## Supporting Information

All in vivo results values are reported as mean  $\pm$  one standard deviation (SD). Statistical evaluation of in vivo data was conducted using a two-way analysis of variance (ANOVA) and Dunnett's Test, both at  $\alpha = 0.05$  significance level, on GraphPad Prism v9.5.1.

### Supporting Text S4: Plasma Dosimetry Chemicals, Materials, and Analysis

Sprague Dawley rodent plasma (pooled, mixed sex) collected with ethylenediaminetetraacetic acid (EDTA) and sterile filtered (0.2  $\mu\text{m}$ ) was obtained from BioIVT (Westbury, NY, USA) and stored at  $-80\text{ }^{\circ}\text{C}$  until use as the control matrix for generating calibration curves and as the matrix blank during plasma sample analysis. The HFPO-TeA (98.97% pure) used for calibration curve preparation was obtained from Oakwood Products Inc. (West Columbia, South Carolina, USA). Unlabeled perfluorohexadecanoic acid (CASRN 67905-19-5 | DTXSID1070800 | PFHxDA;  $\geq 98\%$  pure) was obtained from Cambridge Isotope Laboratories (Tewksbury, MA, USA) to serve as the internal standard since a labeled HFPO-TeA standard was not commercially available.

Aliquots (25  $\mu\text{L}$ ) were denatured with MeOH and  $\text{H}_2\text{O}$  containing 0.1 M FA and then crashed using ACN. Volumes of MeOH, FA, and ACN were determined by the anticipated sample concentrations of HFPO-TeA: 20-1,338 ng HFPO-TeA/mL plasma = 5  $\mu\text{L}$  MeOH + 100  $\mu\text{L}$  FA + 500  $\mu\text{L}$  ACN; 491- 80,280 ng HFPO-TeA/mL plasma = 100  $\mu\text{L}$  MeOH + 875  $\mu\text{L}$  FA then 50  $\mu\text{L}$  subsample removed and crashed with 950  $\mu\text{L}$  ACN. Anticipated sample ranges were intentionally overlapped to account for HFPO-TeA concentration differences due to biological variability among the dose groups. The internal standard PFHxDA was added prior to the ACN crash. Samples were vortexed after the addition of each solvent. After the addition of all solvents, samples were stored at  $-20\text{ }^{\circ}\text{C}$  for 30 min then centrifuged at  $25,000 \times g$  for 30 min. Supernatants were collected and stored at  $-20\text{ }^{\circ}\text{C}$  prior to analysis.

Samples were quantitated against matrix-matched calibration curves containing a minimum of 5 points spanning the range 20 – 80,280 ng/mL plasma. Calibrants were prepared by spiking commercial rat plasma (BioIVT) with HFPO-TeA and PFHxDA and then extracted in the same manner as study samples. Calibration curves had a quadratic fit with a correlation coefficient  $\geq 0.995$ .

### Supporting Text S5: Normalization of Dosimetry Data Calculations

Percent dose of HFPO-TeA in plasma was calculated using the observed plasma concentrations and the average plasma volume for Sprague Dawley rats [1]. The density of plasma was then used to convert from mL plasma to grams plasma for ease of comparison to the liver percent dose data [2]. Average percent dose of HFPO-TeA in liver was calculated using the observed liver concentrations and liver weights. These calculations allow for a comparison of the potential saturation of available proteins in both matrices.

### Supporting Text S6: Liver Dosimetry Chemicals, Materials, and Analysis

Sprague Dawley rodent liver (unidentified, mixed sex) was obtained from BioIVT and stored at  $-80\text{ }^{\circ}\text{C}$  until use as the matrix substitute for generating calibration curves and as the matrix blank during sample analysis. HFPO-TeA used for calibration curve preparation and the internal standard PFHxDA were the same as for the plasma dosimetry.

Sample aliquots (10 mg) were placed into 2 mL lysing tubes containing 1.4 mm ceramic beads (MP Biomedicals, Irvine, CA, USA) and then combined with 200  $\mu\text{L}$  of ACN containing 0.1% FA and 10 ng of PFHxDA. Samples were homogenized using an OMNI Bead Ruptor (OMNI International, Kennesaw, GA, USA) with the following settings: 2 cycles, 60 second cycle time, 5.5 m/sec speed, and 30 second dwell time. The sample was centrifuged at  $26,000 \times g$  for 1 hour, the supernatant transferred to a separate

## Supporting Information

tube, and then further crashed with 200  $\mu$ L ACN. This was repeated twice more to generate a final combined supernatant volume of 600  $\mu$ L. Supernatants were stored at -20  $^{\circ}$ C prior to analysis.

Samples were quantitated against matrix-matched calibration curves containing a minimum of 5 points spanning the range 0.99 – 141 ng/mg liver (wet weight, ww). For the calibration standards, commercial rat liver (BioIVT) was spiked with HFPO-TeA and PFHxDA, homogenized, and extracted using the above procedure. Calibration curves had a quadratic fit with a correlation coefficient  $\geq 0.995$ .

### Supporting Text S7: Plasma-to-Liver Partitioning Calculations

Concentrations of HFPO-TeA in liver and plasma were used to calculate experimental  $K_p$  values for both sexes across all dose levels using Equation A [3-5].

$$(A) K_p = \frac{Concentration_{organ}}{Concentration_{plasma}}$$

### Supporting Text S8: Non-Targeted Analysis Method and Data Processing

Each sample batch included a mobile phase blank and solvent blank to monitor for the presence of laboratory contamination, and a system suitability sample consisting of the set of isotopically labeled PFAS tracer compounds spiked into extraction solvent to monitor instrument performance prior to sample analysis. The mass spectrometer was operated in negative ion ESI mode. Eluents and the column used were the same as for targeted analysis. The LC gradient used is found in Table S8. Non-targeted data were collected using both information dependent analysis (IDA) and data independent analysis (sequential window acquisition of all theoretical ions; SWATH) modes. Mass calibration was verified to within 2 ppm daily before analysis and after every 5 injections. Instrument conditions are presented in Table S6. Data processing, library searching, and formula finding were performed using Sciex software package OS 3.0 with details outlined in Table S1. A high-resolution, exact mass spectral library created in house from IDA scans of commercially available PFAS standards analyzed on the same mass spectrometer as the samples and using the same instrument parameters was used for library searches. Additionally, peak picking and alignment, normalization and statistical analysis were performed with Sciex MarkerView 1.3.1 with details outlined in Table S2. The most likely ratio (MLR) method was used for normalization of the peak abundances of sample replicates before normalization between sample groups [6].

Table S1: Data processing parameters used with Sciex OS 3.0.

| Parameter                             | Value                     |
|---------------------------------------|---------------------------|
| Workflow                              | Non-Targeted Screening    |
| Integration Algorithm                 | MQ4                       |
| Library Searching Algorithm           | Smart Confirmation Search |
| Library                               | In House PFAS             |
| Precursor Mass Tolerance, Da          | 0.4                       |
| Fragment Mass Tolerance, Da           | 0.4                       |
| Formula Finder Mass Tolerance, ppm    | 5                         |
| Formula Finder Compound Type          | Man-Made                  |
| Peak Detection Minimum Retention Time | 1.5                       |
| Peak Detection Sensitivity            | Exhaustive                |

## Supporting Information

|                                           |     |
|-------------------------------------------|-----|
| Area Ratio Threshold<br>(Unknown/Control) | 2   |
| Group Peaks by Adduct or Charge           | Yes |

**Table S2:** Data processing parameters used with Sciex MarkerView 1.3.1.

| Process                 | Parameter                                | Value  |
|-------------------------|------------------------------------------|--------|
|                         | Experiment                               | TOFMS  |
| Peak Peaking            | Minimum Retention Time, min              | 1      |
|                         | Subtraction Offset, scans                | 10     |
|                         | Subtraction Multiplication Factor        | 1.3    |
|                         | Noise Threshold                          | 2      |
|                         | Minimum Spectral Peak Width, Da          | 0.01   |
|                         | Minimum Retention Time Peak Width, scans | 2      |
| Alignment and Filtering | Perform Background Subtraction           | Yes    |
|                         | Chemical Noise Intensity Multiplier      | 1.5    |
|                         | Maximum Number of Peaks                  | 5000   |
|                         | Intensity Threshold                      | 2      |
|                         | Isotope Filtering                        | No     |
|                         | Remove Peaks in <, Samples               | 2      |
|                         | Retention Time Correction                | Yes    |
|                         | Correction Type                          | Linear |
|                         | Mass Tolerance                           | 5 ppm  |
|                         | RT Tolerance, min                        | 0.5    |

### Supporting Text S9: Hepatocyte Metabolic Stability Assay Materials, Chemicals, and Calculations

Pooled human and rat cryopreserved primary hepatocyte suspensions were both obtained from BioIVT, a US Food and Drug Administration-licensed and inspected donor center, and produced using non-transplantable tissue. The human 50-donor pool selected from BioIVT's commercially available, pre-pooled lots was confirmed to have 85% post-thaw viability on the day of the experiment using trypan-blue exclusion. The rodent suspension was comprised of a 24-donor pool of mixed sex Sprague Dawley rat hepatocytes and was confirmed to have 78% viability on the day of the experiment. Vendor-generated metabolic characterization information was reviewed for both lots and deemed acceptable prior to study start. William's E media, dexamethasone (98% pure), and cell maintenance cocktail B were obtained from Thermo Fisher Scientific (Waltham, MA, USA), the OptiThaw hepatocyte kit from Sekisui/Xenotech (Tokyo, Japan), and the trypan blue s (Sekisui/ Xenotech, Tokyo, Japan) and the trypan blue solution from Bio-Rad (Hercules, CA, USA).

The chemicals HFPO-DA (98.97% pure), HFPO-TA (97% pure), and HFPO-TeA (94.8% pure) used for assays were procured through US EPA contract #68HE0D18D0001 with Evotec Inc. (Branford, CT, USA) which provided dosing solutions solubilized in 95% ethanol. Mass-labeled  $^{13}\text{C}_3$ -HFPO-DA (> 98% pure) was obtained from Wellington Laboratories and served as an internal standard. Propanolol ( $\geq 98\%$

## Supporting Information

pure) from Millipore Sigma and phenacetin ( $\geq 98\%$  pure) from Sigma Aldrich were used as assay reference compounds.

Hepatic metabolic clearance data was plotted in semi-log format (ln concentration vs. time) with three replicates at each time point as previously described [7]. Linear regression analysis in conjunction with a standard F-test was used to determine whether the slope of the line (indicative of chemical clearance) was significantly different from 0. Equations (B) and (C) described below were used to calculate chemical half-life ( $T_{1/2}$ ) and intrinsic clearance ( $Cl_{int}$ ) with units of  $\mu\text{L}/(\text{minute} \cdot \text{million hepatocytes})$ . In equation (D), the scalar 2000 is used to adjust assay cell number up to be consistent with units of 1 million cells in the  $Cl_{int}$  equation.

$$(B) k = -(slope)$$

$$(C) T_{1/2} = \frac{0.693}{k}$$

$$(D) Cl_{int} = \frac{(2000 * 0.693)}{T_{1/2}}$$

### Supporting Text S10: Plasma Protein Binding Materials, Chemicals, Assay Design, and Calculations

Human plasma and Sprague Dawley rodent plasma were obtained from BioIVT. Human plasma was obtained from de-identified donors (5 male, 5 female) ranging in age from 20-50 years and pooled from both sexes. Because this analysis uses pooled, de-identified plasma, it was judged not to constitute human subjects research and therefore was not subject to IRB review or approval. Rat plasma was of mixed sex. All plasma was collected with  $\text{K}_3\text{EDTA}$  and sterile filtered ( $0.2 \mu\text{m}$ ).

The chemicals HFPO-DA, HFPO-TA, HFPO-TeA, and  $^{13}\text{C}_3$ -HFPO-DA used for ultracentrifugation assay were the same as those used for the metabolic stability and metabolic formation assays.

Fraction unbound ( $f_u$ ) in plasma ( $f_{up}$ ) was calculated by dividing the aqueous fraction (AF) concentration by the T300 min concentration (Equation E). Chemical stability in plasma was assessed using the T60 min and T300 min concentrations (Equation F).

$$(E) f_{up} = \frac{AF}{T300minutes}$$

$$(F) \text{Percent Stability} = \frac{T300minutes}{T60minutes} * 100$$

### Supporting Text S11: In Vitro-In Vivo Extrapolation (IVIVE) and Administered Equivalent Dose (AED) Calculations

The pharmacokinetic equation used to estimate expected steady-state concentrations ( $C_{ss}$ ) is based on zero order uptake of a daily dose from the gut (assuming 100% bioavailability) with both nonmetabolic renal clearance ( $Cl_{renal}$ ) and hepatic clearance ( $Cl_{hepatic}$ ) (Equation G) [8,9]. The chemical input rate ( $k_0$ ) is the product of the intake dosage and the model body weight; this represents the numerator of Equation G. The  $Cl_{renal}$  calculation is shown in the first part of the denominator of Equation G; it is product of the species-dependent glomerular filtration rate (GFR) and the unbound fraction in

## Supporting Information

blood ( $f_{ub}$ ) of the parent compound. The  $Cl_{hepatic}$  calculation is shown in the second part of the denominator of Equation G; it is the product of the species dependent liver blood flow constant, the  $f_{ub}$  of the parent compound, and the experimentally derived intrinsic clearance (shown in Equation D) divided by the sum these three values. All values used in Equation G are for first order conditions of metabolism in the liver. All calculations, scalars, and species dependent values used to conduct the  $C_{ss}$  calculation to facilitate in vitro-in vivo extrapolation (IVIVE) are provided Table S19 within the Excel worksheet, the tab labelled IVIVE-Css.

$$(G) C_{ss} = \frac{ko}{GFR * f_u + \frac{Q1 * f_{ub} * Cl_{int}}{Q1 + f_{ub} + Cl_{int}}}$$

Based on the principle of reverse dosimetry, the  $C_{ss}$  values derived from IVIVE will be used as conversion factors to generate AEDs according to Equation H. In this equation, the AED is linearly related to the in vitro concentration and inversely related to the  $C_{ss}$ . It is only valid for first-order metabolism that is expected at ambient exposure levels.

$$(H) AED \left( \frac{mg}{kg \cdot day} \right) = \frac{in\ vitro\ concentration\ (\mu M)}{C_{ss}\ (\mu M) * 1 \frac{mg}{kg \cdot day}}$$

## Supporting Information

**Table S3.** Chemical identification, vendor, purity, and experiment usage for all analytes and internal standards.

| Chemical Name                                                                                    | CASRN      | DTXSID   | Vendor                         | Purity | Experiment            |
|--------------------------------------------------------------------------------------------------|------------|----------|--------------------------------|--------|-----------------------|
| Perfluoro (2,5,8-trimethyl-3,6,9-trioxadecanoic acid (HFPO-TeA))                                 | 13252-13-6 | 70276659 | Synquest Laboratories          | 96.94% | in vivo dosing        |
|                                                                                                  |            |          | Oakwood Products Inc.          | 98.97% | Internal dose and NTA |
|                                                                                                  |            |          | Oakwood Products Inc.*         | 94.8%  | In-vitro assays       |
| Perfluoro (2,5-dimethyl-3,6-dioxananoic acid (HFPO-TA))                                          | 13252-14-7 | 00892442 | Matrix Scientific*             | 97%    | In-vitro assays       |
| Perfluoro (2-methyl-3-oxahexanoic acid (HFPO-DA; GenX))                                          | 65294-16-8 | 70880215 | Oakwood Products Inc.*         | 98.97% | In-vitro assays       |
| <sup>13</sup> C <sub>3</sub> -HFPO-DA                                                            | N/A        | N/A      | Wellington Laboratories        | > 98%  | In-vitro assays       |
| Perfluorohexadecanoic acid (PFHxDA)                                                              | 67905-19-5 | 1070800  | Cambridge Isotope Laboratories | ≥ 98%  | Analytical chemistry  |
| <sup>13</sup> C <sub>4</sub> Perfluorobutanoic acid ( <sup>13</sup> C <sub>4</sub> -PFBA)        | N/A        | N/A      | Wellington Laboratories        | > 98%  | Analytical chemistry  |
| <sup>13</sup> C <sub>5</sub> Perfluoropentanoic acid ( <sup>13</sup> C <sub>5</sub> -PFPeBA)     | N/A        | N/A      | Wellington Laboratories        | > 98%  | Analytical chemistry  |
| <sup>13</sup> C <sub>5</sub> Perfluorohexanoic acid ( <sup>13</sup> C <sub>5</sub> -PFHxA)       | N/A        | N/A      | Wellington Laboratories        | > 98%  | Analytical chemistry  |
| <sup>13</sup> C <sub>9</sub> Perfluorooctanoic acid ( <sup>13</sup> C <sub>8</sub> -PFOA)        | N/A        | N/A      | Wellington Laboratories        | > 98%  | Analytical chemistry  |
| <sup>13</sup> C <sub>9</sub> Perfluorononanoic acid ( <sup>13</sup> C <sub>9</sub> -PFNA)        | N/A        | N/A      | Wellington Laboratories        | > 98%  | Analytical chemistry  |
| <sup>13</sup> C <sub>6</sub> Perfluorodecanoic acid ( <sup>13</sup> C <sub>6</sub> -PFDA)        | N/A        | N/A      | Wellington Laboratories        | > 98%  | Analytical chemistry  |
| <sup>13</sup> C <sub>7</sub> Perfluoroundecanoic acid ( <sup>13</sup> C <sub>7</sub> -PFUnDA)    | N/A        | N/A      | Wellington Laboratories        | > 98%  | Analytical chemistry  |
| <sup>13</sup> C <sub>2</sub> Perfluorododecanoic acid ( <sup>13</sup> C <sub>2</sub> -PFDoDA)    | N/A        | N/A      | Wellington Laboratories        | > 98%  | Analytical chemistry  |
| <sup>13</sup> C <sub>2</sub> Perfluorotetradecanoic acid ( <sup>13</sup> C <sub>2</sub> -PFTeDA) | N/A        | N/A      | Wellington Laboratories        | > 98%  | Analytical chemistry  |
| <sup>13</sup> C <sub>3</sub> Perfluorobutane sulfonate ( <sup>13</sup> C <sub>3</sub> -PFBS)     | N/A        | N/A      | Wellington Laboratories        | > 98%  | Analytical chemistry  |
| <sup>13</sup> C <sub>3</sub> Perfluorohexane sulfonate ( <sup>13</sup> C <sub>3</sub> -PFHxS)    | N/A        | N/A      | Wellington Laboratories        | > 98%  | Analytical chemistry  |
| <sup>13</sup> C <sub>3</sub> Perfluorooctane sulfonate ( <sup>13</sup> C <sub>3</sub> -PFOS)     | N/A        | N/A      | Wellington Laboratories        | > 98%  | Analytical chemistry  |
| 3,3',5'-Triiodothyronine (T3)                                                                    | 6893-02-3  | 8023216  | Cerilliant Corporation         | > 99%  | Analytical chemistry  |
| <sup>13</sup> C <sub>6</sub> -T3                                                                 | N/A        | N/A      | Cerilliant Corporation         | > 98%  | Analytical chemistry  |
| 3,3',5'-Triiodothyronine (rT3)                                                                   | 5817-39-0  | 3046908  | Cerilliant Corporation         | > 98%  | Analytical chemistry  |
| <sup>13</sup> C <sub>6</sub> -rT3                                                                | N/A        | N/A      | Cerilliant Corporation         | > 99%  | Analytical chemistry  |
| L-thyroxine (T4)                                                                                 | 300-30-1   | 0023662  | Cerilliant Corporation         | > 98%  | Analytical chemistry  |
| <sup>13</sup> C <sub>6</sub> -T4                                                                 | N/A        | N/A      | Cerilliant Corporation         | > 98%  | Analytical chemistry  |

\*Denotes chemicals procured through US EPA contract#68HE0D18D0001 with EvoTec Inc. (Branford, CT), who provided dosing solutions solubilized in 95% ethanol.

## Supporting Information

**Table S4.** Mobile phase gradient for targeted analysis of thyroid hormones in plasma on a Sciex 6500+ QTRAP. Both mobile phases contained 0.1% formic acid as an additive.

| Time (min) | %A (H <sub>2</sub> O)  | %B (MeOH) |
|------------|------------------------|-----------|
| 0.01       | 70                     | 30        |
| 3.89       | 30                     | 70        |
| 4.66       | 30                     | 70        |
| 4.67       | 10                     | 90        |
| 6.22       | 10                     | 90        |
| 6.23       | 70                     | 30        |
| 8.55       | 70                     | 30        |
| 8.56       | System Controller Stop |           |

**Table S5.** Various instrument conditions for plasma thyroid hormone quantitation on a Sciex 6500+ QTRAP.

| Sciex 6500+ Parameter   | Setting  |
|-------------------------|----------|
| Source                  | ESI      |
| Polarity                | Positive |
| Scan Type               | MRM      |
| Source Temperature (°C) | 500      |
| Spray Voltage (kV)      | 5.5      |
| Curtain Gas (psi)       | 35       |
| Ion Source Gas 1 (psi)  | 90       |
| Ion Source Gas 2 (psi)  | 80       |
| Collision Gas           | Medium   |
| Detection Window (sec)  | 80       |
| Scan Time (sec)         | 0.33     |

**Table S4.** Monitored transitions for analysis of thyroid hormones and <sup>13</sup>C-labeled internal standards on a Sciex 6500+ QTRAP. All ions were acquired in positive ion mode.

| Analyte             | Precursor Ion | Fragment Ion | Declustering Potential (DP) | Collision Energy (CE) | Transition Type |
|---------------------|---------------|--------------|-----------------------------|-----------------------|-----------------|
| T3                  | 651.80        | 605.7        | 100                         | 100.0                 | Quant           |
|                     | 651.80        | 478.9        | 100                         | 50.5                  | Qual            |
| <sup>13</sup> C-T3  | 657.80        | 605.7        | 100                         | 33.0                  | IS              |
| rT3                 | 651.75        | 605.7        | 100                         | 34.0                  | Quant           |
|                     | 651.75        | 508.1        | 100                         | 35.0                  | Qual            |
| <sup>13</sup> C-rT3 | 657.80        | 605.7        | 100                         | 33.0                  | IS              |
| T4                  | 777.70        | 731.7        | 100                         | 40.0                  | Quant           |
|                     | 777.70        | 605.1        | 100                         | 58.3                  | Qual            |
| <sup>13</sup> C-T4  | 783.70        | 737.7        | 100                         | 53.0                  | IS              |

Quant: Quantifier ion; Qual: Qualifier ion; IS: Internal standard ion.



## Supporting Information

**Table S5.** Mobile phase gradient for targeted analysis of HFPO-TeA on a Sciex X500R QTOF/MS. Both mobile phases contained ammonium formate (4 mM) as an additive.

| <b>Time (min)</b> | <b>%A (95:5 H<sub>2</sub>O/MeOH)</b> | <b>%B (95:5 MeOH/H<sub>2</sub>O)</b> |
|-------------------|--------------------------------------|--------------------------------------|
| 0.0               | 98                                   | 2                                    |
| 1.0               | 40                                   | 60                                   |
| 5.0               | 0                                    | 100                                  |
| 10.0              | 0                                    | 100                                  |
| 10.1              | 98                                   | 2                                    |
| 15                | 98                                   | 2                                    |

## Supporting Information

**Table S6.** Various instrument conditions for sample analysis on a Sciex X500R QTOF/MS.

| Sciex X500R Parameter                | MRM<br>Targeted Analysis | Information Dependent<br>Analysis<br>Non-Targeted | Information Independent<br>Analysis<br>Non-Targeted |
|--------------------------------------|--------------------------|---------------------------------------------------|-----------------------------------------------------|
| Source                               | ESI                      | ESI                                               | ESI                                                 |
| Polarity                             | Negative                 | Negative                                          | Negative                                            |
| Scan Type                            | MRM                      | IDA                                               | SWATH                                               |
| Ion Source Gas 1 (psi)               | 30                       | 30                                                | 30                                                  |
| Ion Source Gas 2 (psi)               | 30                       | 35                                                | 35                                                  |
| Curtain Gas (psi)                    | 30                       | 30                                                | 30                                                  |
| CAD Gas                              | 8                        | 8                                                 | 8                                                   |
| Source Temperature (°C)              | 400                      | 400                                               | 400                                                 |
| Spray Voltage (V)                    | -4500                    | -3750                                             | -3750                                               |
| TOF MS Scan Range (Da)               | 100-1000                 | 100-1250                                          | 100-1500                                            |
| TOF MS DP (V)                        | -95                      | -50                                               | -50                                                 |
| TOF MS DP Spread (V)                 | 0                        | 0                                                 | 0                                                   |
| TOF MS CE (V)                        | -10                      | -5                                                | -5                                                  |
| TOF MS CE Spread (V)                 | 0                        | 0                                                 | 0                                                   |
| TOF MS Accumulation<br>Time (sec)    | 0.25                     | 0.1                                               | 0.1                                                 |
| TOF MSMS Scan Range<br>(Da)          | N/A                      | 50-1250                                           | 50-1250                                             |
| TOF MSMS Accumulation<br>Time (sec)  | 0.1                      | 0.05                                              | 0.05                                                |
| Monitored Transition 1<br>(MT1)      | 350.97 → 184.9856        | N/A                                               | N/A                                                 |
| MT1 TOF MSMS DP (V)                  | -25                      | N/A                                               | N/A                                                 |
| MT1 TOF MSMS CE (V)                  | -45                      | N/A                                               | N/A                                                 |
| Monitored Transition 2<br>(MT2)      | 350.97 → 118.9919        | N/A                                               | N/A                                                 |
| MT2 TOF MSMS DP (V)                  | -25                      | N/A                                               | N/A                                                 |
| MT2 TOF MSMS CE (V)                  | -35                      | N/A                                               | N/A                                                 |
| Monitored Transition 3<br>(MT3)      | 812.95 → 768.9514        | N/A                                               | N/A                                                 |
| MT3 TOF MSMS DP (V)                  | -25                      | N/A                                               | N/A                                                 |
| MT3 TOF MSMS CE (V)                  | -15                      | N/A                                               | N/A                                                 |
| TOF MSMS DP (V)                      | N/A                      | -40                                               | -40                                                 |
| TOF MSMS DP Spread (V)               | 0                        | 0                                                 | 0                                                   |
| TOF MSMS CE (V)                      | N/A                      | -30                                               | -30                                                 |
| TOF MSMS CE Spread (V)               | N/A                      | 15                                                | 15                                                  |
| Maximum Candidate Ions               | N/A                      | 15                                                | N/A                                                 |
| Minimum Intensity<br>Threshold (CPS) | N/A                      | 100                                               | N/A                                                 |
| Total Scan Time (sec)                | 0.612                    | 0.927                                             | 0.954                                               |
| Estimated Cycles                     | 1471                     | 2931                                              | 2831                                                |

## Supporting Information

**Table S7.** Monitored transitions for analysis of HFPO-TeA using PFHxDA as an internal standard on a Sciex X500R QTOF/MS. The ion of m/z 350.97 is the in-source fragment formed from the HFPO-TeA molecular ion of m/z 660.97. All ions were acquired in negative ion mode.

| Analyte  | Precursor Ion | Fragment Ion | DP  | CE  | Transition Type |
|----------|---------------|--------------|-----|-----|-----------------|
| HFPO-TeA | 350.97        | 184.9856     | -25 | -45 | Quant           |
|          |               | 118.9919     | -25 | -35 | Qual            |
| PFHxDA   | 812.95        | 768.9514     | -25 | -15 | IS              |

Quant: Quantifier ion; Qual: Qualifier ion; IS: Internal standard ion.

**Table S8.** Mobile phase gradient for non-targeted analysis on a Sciex X500R QTOF/MS. Ammonium formate (4 mM) was present in both mobile phases as an additive.

| Time (min) | %A (95:5 H <sub>2</sub> O/MeOH) | %B (95:5 MeOH/H <sub>2</sub> O) |
|------------|---------------------------------|---------------------------------|
| 0.0        | 98                              | 2                               |
| 1.0        | 90                              | 10                              |
| 25.0       | 0                               | 100                             |
| 30.0       | 0                               | 100                             |
| 30.1       | 98                              | 2                               |
| 45.0       | 98                              | 2                               |

**Table S9.** Mobile phase gradient for targeted analysis of HFPO-TeA on a Waters Xevo-TQS. Both mobile phases contained the additive ammonium acetate (2.5 mM).

| Time (min) | %A (95:5 H <sub>2</sub> O/ACN) | %B (95:5 ACN/H <sub>2</sub> O) |
|------------|--------------------------------|--------------------------------|
| 0          | 95                             | 5                              |
| 2          | 95                             | 5                              |
| 2.45       | 80                             | 20                             |
| 2.6        | 50                             | 50                             |
| 3.5        | 42                             | 58                             |
| 4.25       | 34                             | 66                             |
| 4.4        | 25                             | 75                             |
| 5.6        | 20                             | 80                             |
| 5.9        | 0                              | 100                            |
| 7.64       | 0                              | 100                            |
| 7.7        | 80                             | 20                             |
| 8          | 80                             | 20                             |
| 9.5        | 95                             | 5                              |

## Supporting Information

**Table S10.** Various instrument conditions for hepatocyte clearance and protein plasma binding assays on a Waters Xevo-TQS.

| <b>Xevo TQ-S Micro Parameter</b> | <b>Setting</b>    |
|----------------------------------|-------------------|
| Source                           | UniSpray (US)     |
| Polarity                         | Positive/Negative |
| Scan Type                        | MRM               |
| Capillary Voltage (kV)           | 1.00              |
| Cone Gas Flow (L/Hr)             | 0                 |
| Desolvation Gas Flow (L/Hr)      | 650               |
| Source Temperature (°C)          | 110               |

**Table S11.** Monitored transitions for analysis of in vitro analytes using a Waters Xevo-TQS.

| <b>Analyte</b>                        | <b>Precursor Ion</b> | <b>Fragment Ion</b> | <b>Cone (V)</b> | <b>CE</b> | <b>Transition Type</b> | <b>Ion Mode</b> |
|---------------------------------------|----------------------|---------------------|-----------------|-----------|------------------------|-----------------|
| HFPO-DA                               | 285.08               | 169.02              | 2.00            | 6.0       | Quant                  | Negative        |
|                                       |                      | 185.03              |                 | 12        | Qual                   |                 |
| HFPO-TA                               | 494.93               | 118.89              | 42.00           | 40        | Quant                  | Negative        |
|                                       |                      | 184.97              |                 | 8.0       | Qual                   |                 |
| HFPO-TeA                              | 350.97               | 118.90              | 40.00           | 36        | Quant                  | Negative        |
|                                       |                      | 184.92              |                 | 10        | Qual                   |                 |
| <sup>13</sup> C <sub>3</sub> -HFPO-DA | 286.97               | 168.96              | 12.00           | 6.0       | Quant                  | Negative        |
|                                       |                      | 184.97              |                 | 16        | Qual                   |                 |
| Testosterone                          | 289.20               | 97.10               | 33.00           | 20        | Quant                  | Positive        |
|                                       |                      | 109.10              |                 | 15        | Qual                   |                 |
| <sup>13</sup> C-Testosterone          | 292.02               | 100.02              | 42.00           | 22        | Quant                  | Positive        |
|                                       |                      | 111.98              |                 | 24        | Qual                   |                 |
| Phenacetin                            | 180.12               | 92.89               | 32.00           | 28        | Quant                  | Positive        |
|                                       |                      | 110.00              |                 | 22        | Qual                   |                 |
| Propranolol                           | 260.18               | 55.92               | 22.00           | 30        | Quant                  | Positive        |
|                                       |                      | 116.00              |                 | 18        | Qual                   |                 |

Quant: Quantifier ion; Qual: Qualifier ion

## Supporting Information

**Table S12.** Individual body weights, absolute liver weights, and relative liver weights for all rats after 5 days of exposure.

| Rat ID | Dose Level (mg/kg/day) | Sex | Beginning Body Weight (g) | Terminal Body Weight (g) | Body Weight Change (g) | Avg. $\pm$ St. Dev. Body Weight Change (g) | Liver Weight (g) | Relative Liver Weight (g%) | Average $\pm$ St. Dev. Relative Liver Weight (g%) |
|--------|------------------------|-----|---------------------------|--------------------------|------------------------|--------------------------------------------|------------------|----------------------------|---------------------------------------------------|
| R145   | 0                      | M   | 228.1                     | 323.3                    | 35.2                   |                                            | 15.0154          | 4.644                      |                                                   |
| R146   | 0                      | M   | 284.3                     | 315.0                    | 30.7                   |                                            | 15.2084          | 4.828                      |                                                   |
| R147   | 0                      | M   | 283.2                     | 315.4                    | 32.2                   | 31.3 $\pm$ 3.3                             | 14.4240          | 4.573                      | 4.577 $\pm$ 0.236                                 |
| R148   | 0                      | M   | 286.4                     | 313.6                    | 27.2                   |                                            | 13.3673          | 4.263                      |                                                   |
| R149   | 0.3                    | M   | 285.6                     | 313.8                    | 28.2                   |                                            | 13.9494          | 4.445                      |                                                   |
| R150   | 0.3                    | M   | 290.6                     | 330.7                    | 40.1                   |                                            | 16.3796          | 4.953                      |                                                   |
| R151   | 0.3                    | M   | 286.4                     | 334.9                    | 48.5                   | 37.2 $\pm$ 9.0                             | 15.4580          | 4.616                      | 4.702 $\pm$ 0.220                                 |
| R152   | 0.3                    | M   | 286.0                     | 318.0                    | 32.0                   |                                            | 15.2495          | 4.795                      |                                                   |
| R153   | 0.9                    | M   | 274.5                     | 320.5                    | 46.0                   |                                            | 16.7977          | 5.241                      |                                                   |
| R154   | 0.9                    | M   | 277.8                     | 316.1                    | 38.3                   |                                            | 16.8117          | 5.318                      |                                                   |
| R155   | 0.9                    | M   | 286.5                     | 323.9                    | 37.4                   | 39.6 $\pm$ 4.3                             | 16.3850          | 5.059                      | 5.291 $\pm$ 0.201                                 |
| R156   | 0.9                    | M   | 298.3                     | 335.0                    | 36.7                   |                                            | 18.5738          | 5.544                      |                                                   |
| R157   | 2.3                    | M   | 286.1                     | 323.6                    | 37.5                   |                                            | 17.9851          | 5.558                      |                                                   |
| R158   | 2.3                    | M   | 279.6                     | 325.4                    | 45.8                   |                                            | 19.2395          | 5.913                      |                                                   |
| R159   | 2.3                    | M   | 294.6                     | 332.8                    | 38.2                   | 39.0 $\pm$ 4.8                             | 20.9175          | 6.285                      | 5.916 $\pm$ 0.297                                 |
| R160   | 2.3                    | M   | 283.3                     | 317.9                    | 34.6                   |                                            | 18.7875          | 5.910                      |                                                   |
| R161   | 6.3                    | M   | 281.4                     | 308.9                    | 27.5                   |                                            | 19.3187          | 6.254                      |                                                   |
| R162   | 6.3                    | M   | 301.7                     | 344.9                    | 43.2                   |                                            | 25.7576          | 7.468                      |                                                   |
| R163   | 6.3                    | M   | 290.0                     | 321.7                    | 31.7                   | 31.8 $\pm$ 8.1                             | 22.4062          | 6.965                      | 6.983 $\pm$ 0.527                                 |
| R164   | 6.3                    | M   | 283.7                     | 308.4                    | 24.7                   |                                            | 22.3377          | 7.243                      |                                                   |
| R165   | 17                     | M   | 286.9                     | 250.6                    | -36.3                  |                                            | 13.4969          | 5.386                      |                                                   |
| R166   | 17                     | M   | 298.7                     | 248.0                    | -50.7                  |                                            | 13.8697          | 5.593                      |                                                   |
| R167   | 17                     | M   | 286.5                     | 226.8                    | -59.7                  | -51.5 $\pm$ 10.9                           | 12.4995          | 5.511                      | 5.600 $\pm$ 0.223                                 |
| R168   | 17                     | M   | 281.1                     | 221.9                    | -59.2                  |                                            | 13.1122          | 5.909                      |                                                   |
| R181   | 0                      | F   | 231.4                     | 239.4                    | 8.0                    |                                            | 10.6198          | 4.436                      |                                                   |
| R182   | 0                      | F   | 226.1                     | 232.1                    | 6.0                    |                                            | 9.6526           | 4.159                      |                                                   |
| R183   | 0                      | F   | 220.1                     | 225.6                    | 5.5                    | 3.7 $\pm$ 5.7                              | 8.9720           | 3.977                      | 4.190 $\pm$ 0.189                                 |
| R184   | 0                      | F   | 225.1                     | 220.5                    | -4.6                   |                                            | 9.2394           | 4.190                      |                                                   |
| R185   | 0.3                    | F   | 219.6                     | 230.9                    | 11.3                   |                                            | 10.2929          | 4.458                      |                                                   |
| R186   | 0.3                    | F   | 217.4                     | 225.9                    | 8.5                    |                                            | 10.0087          | 4.431                      |                                                   |
| R187   | 0.3                    | F   | 228.7                     | 229.7                    | 1.0                    | 6.5 $\pm$ 4.4                              | 10.5040          | 4.573                      | 4.488 $\pm$ 0.062                                 |
| R188   | 0.3                    | F   | 221.8                     | 226.9                    | 5.1                    |                                            | 10.1866          | 4.489                      |                                                   |
| R189   | 0.9                    | F   | 229.1                     | 237.7                    | 8.6                    |                                            | 12.6621          | 5.327                      |                                                   |
| R190   | 0.9                    | F   | 208.7                     | 227.1                    | 18.4                   |                                            | 11.3910          | 5.016                      |                                                   |
| R191   | 0.9                    | F   | 219.8                     | 230.2                    | 10.4                   | 12.2 $\pm$ 4.3                             | 11.9531          | 5.192                      | 5.086 $\pm$ 0.224                                 |
| R192   | 0.9                    | F   | 228.8                     | 240.1                    | 11.3                   |                                            | 11.5466          | 4.809                      |                                                   |
| R193   | 2.3                    | F   | 221.3                     | 229.6                    | 8.3                    |                                            | 12.3341          | 5.372                      |                                                   |
| R194   | 2.3                    | F   | 224.4                     | 245.9                    | 21.5                   |                                            | 12.8755          | 5.236                      |                                                   |
| R195   | 2.3                    | F   | 214.7                     | 225.6                    | 10.9                   | 12.3 $\pm$ 6.2                             | 12.0585          | 5.345                      | 5.296 $\pm$ 0.073                                 |
| R196   | 2.3                    | F   | 229.5                     | 238.0                    | 8.5                    |                                            | 12.4504          | 5.231                      |                                                   |
| R197   | 6.3                    | F   | 225.6                     | 213.8                    | -11.8                  |                                            | 10.2774          | 4.807                      |                                                   |
| R198   | 6.3                    | F   | 210.3                     | 189.0                    | -21.3                  |                                            | 9.4969           | 5.025                      |                                                   |
| R199   | 6.3                    | F   | 210.1                     | 207.9                    | -2.2                   | -17.8 $\pm$ 14.3                           | 12.9764          | 6.242                      | 5.329 $\pm$ 0.634                                 |
| R200   | 6.3                    | F   | 215.5                     | 179.8                    | -35.7                  |                                            | 9.4275           | 5.243                      |                                                   |
| R201   | 17                     | F   | 224.5                     | 161.8                    | -62.7                  |                                            | 9.7114           | 6.002                      |                                                   |
| R202   | 17                     | F   | 227.0                     | 174.9                    | -52.1                  |                                            | 9.8972           | 5.659                      |                                                   |
| R203   | 17                     | F   | 214.4                     | 164.8                    | -49.6                  | -55.2 $\pm$ 5.7                            | 9.1738           | 5.567                      | 5.796 $\pm$ 0.216                                 |
| R204   | 17                     | F   | 222.9                     | 166.6                    | -56.3                  |                                            | 9.9260           | 5.958                      |                                                   |

## Supporting Information

**Table S13.** Individual concentrations for plasma T3, rT3, and T4 in all rats after 5 days of exposure to HFPO-TeA. < LOQ = sample concentration was below the LOQ (rT3 =0.005 ng/mL). N/A = Calculation not completed due the majority of samples being below the LOQ.

| Rat ID | Dose Level (mg/kg/day) | Sex | T3 Conc. (ng/mL) | Avg. ± St. Dev. T3 Conc. (ng/mL) | rT3 Conc. (ng/mL) | Avg. ± St. Dev. rT3 Conc. (ng/mL) | T4 Conc. (ng/mL) | Avg. ± St. Dev. T4 Conc. (ng/mL) |      |
|--------|------------------------|-----|------------------|----------------------------------|-------------------|-----------------------------------|------------------|----------------------------------|------|
| R145   | 0                      | M   | 0.644            |                                  | < LOQ             |                                   | 35.3             |                                  |      |
| R146   | 0                      | M   | 0.736            | 0.737 ± 0.066                    | 0.0510            | 0.0510 ± N/A                      | 41.6             | 39.8 ± 3.6                       |      |
| R147   | 0                      | M   | 0.775            |                                  | < LOQ             |                                   |                  |                                  | 38.5 |
| R148   | 0                      | M   | 0.793            |                                  | < LOQ             |                                   |                  |                                  | 43.6 |
| R149   | 0.3                    | M   | 0.920            |                                  | 0.127             |                                   | 50.1             |                                  |      |
| R150   | 0.3                    | M   | 0.695            | 0.811 ± 0.111                    | < LOQ             | 0.127 ± N/A                       | 36.3             | 37.6 ± 10.4                      |      |
| R151   | 0.3                    | M   | 0.891            |                                  | < LOQ             |                                   |                  |                                  | 24.7 |
| R152   | 0.3                    | M   | 0.739            |                                  | < LOQ             |                                   |                  |                                  | 39.4 |
| R153   | 0.9                    | M   | 0.829            |                                  | < LOQ             |                                   | 37.5             |                                  |      |
| R154   | 0.9                    | M   | 0.783            | 0.723 ± 0.105                    | < LOQ             | N/A                               | 37.0             | 38.8 ± 5.2                       |      |
| R155   | 0.9                    | M   | 0.687            |                                  | < LOQ             |                                   |                  |                                  | 46.3 |
| R156   | 0.9                    | M   | 0.594            |                                  | < LOQ             |                                   |                  |                                  | 34.4 |
| R157   | 2.3                    | M   | 0.633            |                                  | 0.188             |                                   | 36.0             |                                  |      |
| R158   | 2.3                    | M   | 0.764            | 0.678 ± 0.101                    | < LOQ             | 0.188 ± N/A                       | 37.6             | 35.8 ± 10.9                      |      |
| R159   | 2.3                    | M   | 0.556            |                                  | < LOQ             |                                   |                  |                                  | 48.1 |
| R160   | 2.3                    | M   | 0.759            |                                  | < LOQ             |                                   |                  |                                  | 21.5 |
| R161   | 6.3                    | M   | 0.680            |                                  | 0.061             |                                   | 30.9             |                                  |      |
| R162   | 6.3                    | M   | 0.627            | 0.630 ± 0.060                    | 0.081             | 0.0847 ± 0.0257                   | 26.7             | 32.9 ± 6.9                       |      |
| R163   | 6.3                    | M   | 0.667            |                                  | 0.112             |                                   |                  |                                  | 31.3 |
| R164   | 6.3                    | M   | 0.547            |                                  | < LOQ             |                                   |                  |                                  | 42.7 |
| R165   | 17                     | M   | 0.334            |                                  | < LOQ             |                                   | 8.34             |                                  |      |
| R166   | 17                     | M   | 0.518            | 0.423 ± 0.078                    | 0.0630            | 0.0630 ± N/A                      | 14.0             | 9.82 ± 2.94                      |      |
| R167   | 17                     | M   | 0.444            |                                  | < LOQ             |                                   |                  |                                  | 9.60 |
| R168   | 17                     | M   | 0.394            |                                  | < LOQ             |                                   |                  |                                  | 7.34 |
| R181   | 0                      | F   | 0.717            |                                  | < LOQ             |                                   | 35.9             |                                  |      |
| R182   | 0                      | F   | 0.689            | 0.870 ± 0.200                    | < LOQ             | 0.153 ± N/A                       | 26.0             | 29.7 ± 4.3                       |      |
| R183   | 0                      | F   | 0.973            |                                  | < LOQ             |                                   |                  |                                  | 28.5 |
| R184   | 0                      | F   | 1.10             |                                  | 0.153             |                                   |                  |                                  | 28.2 |
| R185   | 0.3                    | F   | 1.00             |                                  | < LOQ             |                                   | 30.9             |                                  |      |
| R186   | 0.3                    | F   | 0.775            | 0.844 ± 0.106                    | < LOQ             | 0.143 ± N/A                       | 36.4             | 31.3 ± 3.5                       |      |
| R187   | 0.3                    | F   | 0.784            |                                  | < LOQ             |                                   |                  |                                  | 29.1 |
| R188   | 0.3                    | F   | 0.817            |                                  | 0.143             |                                   |                  |                                  | 28.9 |
| R189   | 0.9                    | F   | 0.974            |                                  | < LOQ             |                                   | 30.2             |                                  |      |
| R190   | 0.9                    | F   | 0.862            | 0.799 ± 0.167                    | < LOQ             | N/A                               | 29.2             | 26.8 ± 4.2                       |      |
| R191   | 0.9                    | F   | 0.782            |                                  | < LOQ             |                                   |                  |                                  | 20.9 |
| R192   | 0.9                    | F   | 0.577            |                                  | < LOQ             |                                   |                  |                                  | 26.9 |
| R193   | 2.3                    | F   | 0.783            |                                  | 0.0960            |                                   | 35.6             |                                  |      |
| R194   | 2.3                    | F   | 0.750            | 0.781 ± 0.024                    | < LOQ             | 0.105 ± 0.012                     | 38.4             | 34.9 ± 5.8                       |      |
| R195   | 2.3                    | F   | 0.782            |                                  | 0.113             |                                   |                  |                                  | 26.5 |
| R196   | 2.3                    | F   | 0.809            |                                  | < LOQ             |                                   |                  |                                  | 38.9 |
| R197   | 6.3                    | F   | 0.729            |                                  | < LOQ             |                                   | 26.4             |                                  |      |
| R198   | 6.3                    | F   | 0.399            | 0.563 ± 0.162                    | < LOQ             | 0.0860 ± N/A                      | 16.8             | 19.9 ± 7.1                       |      |
| R199   | 6.3                    | F   | 0.672            |                                  | 0.0860            |                                   |                  |                                  | 24.9 |
| R200   | 6.3                    | F   | 0.451            |                                  | < LOQ             |                                   |                  |                                  | 11.3 |
| R201   | 17                     | F   | 0.806            |                                  | 0.0480            |                                   | 21.9             |                                  |      |
| R202   | 17                     | F   | 0.548            | 0.585 ± 0.160                    | < LOQ             | 0.0510 ± 0.0042                   | 16.2             | 15.9 ± 5.9                       |      |
| R203   | 17                     | F   | 0.425            |                                  | < LOQ             |                                   |                  |                                  | 7.77 |
| R204   | 17                     | F   | 0.562            |                                  | 0.0540            |                                   |                  |                                  | 17.9 |

## Supporting Information

**Table S14.** Individual HFPO-TeA plasma and plasma extract concentrations for all rats after 2 hours of exposure. < LOQ = sample concentration was below the LOQ (20 ng/mL or 0.0302 µM) N/A = not applicable due to data being below the LOQ.

| Rat ID | Dose Level (mg/kg/day) | Sex | Plasma Extract Conc. (ng/mL) | Dilution Factor | Plasma Conc. (µg/mL) | Plasma Conc. (µM) | Avg. ± St. Dev. Plasma Conc. (µM) |
|--------|------------------------|-----|------------------------------|-----------------|----------------------|-------------------|-----------------------------------|
| R145   | 0                      | M   | ND                           | 25              | < LOQ                | < LOQ             |                                   |
| R146   | 0                      | M   | ND                           | 25              | < LOQ                | < LOQ             |                                   |
| R147   | 0                      | M   | ND                           | 25              | < LOQ                | < LOQ             | N/A                               |
| R148   | 0                      | M   | ND                           | 25              | < LOQ                | < LOQ             |                                   |
| R149   | 0.3                    | M   | 4.66                         | 25              | 0.117                | 0.176             |                                   |
| R150   | 0.3                    | M   | 3.76                         | 25              | 0.094                | 0.142             | 0.150 ± 0.020                     |
| R151   | 0.3                    | M   | 3.42                         | 25              | 0.086                | 0.129             |                                   |
| R152   | 0.3                    | M   | 4.05                         | 25              | 0.101                | 0.153             |                                   |
| R153   | 0.9                    | M   | 8.62                         | 50              | 0.431                | 0.651             |                                   |
| R154   | 0.9                    | M   | 5.81                         | 50              | 0.291                | 0.439             | 0.573 ± 0.113                     |
| R155   | 0.9                    | M   | 8.99                         | 50              | 0.450                | 0.679             |                                   |
| R156   | 0.9                    | M   | 6.90                         | 50              | 0.345                | 0.521             |                                   |
| R157   | 2.3                    | M   | 19.1                         | 400             | 7.65                 | 11.6              |                                   |
| R158   | 2.3                    | M   | 28.6                         | 400             | 11.4                 | 17.3              | 13.1 ± 2.8                        |
| R159   | 2.3                    | M   | 20.1                         | 400             | 8.06                 | 12.2              |                                   |
| R160   | 2.3                    | M   | 18.6                         | 400             | 7.45                 | 11.3              |                                   |
| R161   | 6.3                    | M   | 59.3                         | 400             | 23.7                 | 35.8              |                                   |
| R162   | 6.3                    | M   | 61.0                         | 400             | 24.4                 | 36.8              | 34.0 ± 5.5                        |
| R163   | 6.3                    | M   | 42.7                         | 400             | 17.1                 | 25.8              |                                   |
| R164   | 6.3                    | M   | 62.4                         | 400             | 24.9                 | 37.7              |                                   |
| R165   | 17                     | M   | 152                          | 400             | 60.6                 | 91.6              |                                   |
| R166   | 17                     | M   | 139                          | 400             | 55.8                 | 84.3              | 126 ± 62                          |
| R167   | 17                     | M   | 183                          | 400             | 73.0                 | 110               |                                   |
| R168   | 17                     | M   | 361                          | 400             | 114.0                | 218               |                                   |
| R181   | 0                      | F   | ND                           | 25              | < LOQ                | < LOQ             |                                   |
| R182   | 0                      | F   | ND                           | 25              | < LOQ                | < LOQ             |                                   |
| R183   | 0                      | F   | ND                           | 25              | < LOQ                | < LOQ             | N/A                               |
| R184   | 0                      | F   | ND                           | 25              | < LOQ                | < LOQ             |                                   |
| R185   | 0.3                    | F   | 3.28                         | 25              | 0.0820               | 0.124             |                                   |
| R186   | 0.3                    | F   | 4.94                         | 25              | 0.124                | 0.187             | 0.137 ± 0.033                     |
| R187   | 0.3                    | F   | 3.11                         | 25              | 0.0778               | 0.117             |                                   |
| R188   | 0.3                    | F   | 3.14                         | 25              | 0.0785               | 0.119             |                                   |
| R189   | 0.9                    | F   | 5.23                         | 100             | 0.523                | 0.790             |                                   |
| R190   | 0.9                    | F   | 6.18                         | 50              | 0.309                | 0.467             |                                   |
| R191   | 0.9                    | F   | 8.36                         | 50              | 0.418                | 0.631             | 0.620 ± 0.133                     |
| R192   | 0.9                    | F   | 7.84                         | 50              | 0.392                | 0.592             |                                   |
| R193   | 2.3                    | F   | 17.2                         | 400             | 6.87                 | 10.4              |                                   |
| R194   | 2.3                    | F   | 19.4                         | 400             | 7.78                 | 11.7              | 15.1 ± 5.3                        |
| R195   | 2.3                    | F   | 26.9                         | 400             | 10.8                 | 16.3              |                                   |
| R196   | 2.3                    | F   | 36.5                         | 400             | 14.6                 | 22.1              |                                   |
| R197   | 6.3                    | F   | 49.8                         | 400             | 19.5                 | 29.5              |                                   |
| R198   | 6.3                    | F   | 110                          | 400             | 43.9                 | 66.4              |                                   |
| R199   | 6.3                    | F   | 103                          | 400             | 41.1                 | 62.0              | 53.2 ± 16.5                       |
| R200   | 6.3                    | F   | 90.9                         | 400             | 36.3                 | 54.9              |                                   |
| R201   | 17                     | F   | 494                          | 400             | 197                  | 298               |                                   |
| R202   | 17                     | F   | 460                          | 400             | 184                  | 278               |                                   |
| R203   | 17                     | F   | 235                          | 400             | 94.0                 | 142               | 224 ± 76                          |
| R204   | 17                     | F   | 295                          | 400             | 118                  | 179               |                                   |

## Supporting Information

**Table S15.** Individual HFPO-TeA plasma and plasma extract concentrations for all rats after 5 days of exposure. <LOQ = sample concentration was below the LOQ (20 ng/mL or 0.0302 µM) N/A = not applicable due to data being below the LOQ.

| Rat ID | Dose Level (mg/kg/day) | Sex | Plasma Extract Conc. (ng/mL) | Dilution Factor | Plasma Conc. (µg/mL) | Plasma Conc. (µM) | Avg. ± St. Dev. Plasma Conc. (µM) |
|--------|------------------------|-----|------------------------------|-----------------|----------------------|-------------------|-----------------------------------|
| R145   | 0                      | M   | ND                           | 25              | < LOQ                | < LOQ             |                                   |
| R146   | 0                      | M   | ND                           | 25              | < LOQ                | < LOQ             |                                   |
| R147   | 0                      | M   | ND                           | 25              | < LOQ                | < LOQ             | N/A                               |
| R148   | 0                      | M   | ND                           | 25              | < LOQ                | < LOQ             |                                   |
| R149   | 0.3                    | M   | 22.3                         | 25              | 0.558                | 0.843             |                                   |
| R150   | 0.3                    | M   | 23.4                         | 25              | 0.586                | 0.885             | 0.827 ± 0.071                     |
| R151   | 0.3                    | M   | 22.7                         | 25              | 0.567                | 0.856             |                                   |
| R152   | 0.3                    | M   | 19.2                         | 25              | 0.479                | 0.723             |                                   |
| R153   | 0.9                    | M   | 2.34                         | 800             | 1.87                 | 2.83              |                                   |
| R154   | 0.9                    | M   | 1.81                         | 800             | 1.45                 | 2.19              | 2.73 ± 0.45                       |
| R155   | 0.9                    | M   | 2.70                         | 800             | 2.16                 | 3.26              |                                   |
| R156   | 0.9                    | M   | 2.19                         | 800             | 1.75                 | 2.65              |                                   |
| R157   | 2.3                    | M   | 7.10                         | 800             | 5.68                 | 8.58              |                                   |
| R158   | 2.3                    | M   | 4.19                         | 800             | 3.35                 | 5.06              | 6.64± 1.73                        |
| R159   | 2.3                    | M   | 4.38                         | 800             | 3.50                 | 5.29              |                                   |
| R160   | 2.3                    | M   | 6.30                         | 800             | 5.04                 | 7.61              |                                   |
| R161   | 6.3                    | M   | 19.3                         | 800             | 15.5                 | 23.3              |                                   |
| R162   | 6.3                    | M   | 18.9                         | 800             | 15.1                 | 22.9              | 24.5 ± 2.3                        |
| R163   | 6.3                    | M   | 19.7                         | 800             | 5.7                  | 23.8              |                                   |
| R164   | 6.3                    | M   | 23.1                         | 800             | 18.5                 | 28.0              |                                   |
| R165   | 17                     | M   | 43.3                         | 1600            | 65.4                 | 98.9              |                                   |
| R166   | 17                     | M   | 69.6                         | 1600            | 109                  | 165               | 168 ± 53                          |
| R167   | 17                     | M   | 90.6                         | 1600            | 150                  | 227               |                                   |
| R168   | 17                     | M   | 74.6                         | 1600            | 118                  | 179               |                                   |
| R181   | 0                      | F   | ND                           | 25              | < LOQ                | < LOQ             |                                   |
| R182   | 0                      | F   | ND                           | 25              | < LOQ                | < LOQ             |                                   |
| R183   | 0                      | F   | ND                           | 25              | < LOQ                | < LOQ             | N/A                               |
| R184   | 0                      | F   | ND                           | 25              | < LOQ                | < LOQ             |                                   |
| R185   | 0.3                    | F   | 22.0                         | 25              | 0.550                | 0.831             |                                   |
| R186   | 0.3                    | F   | 19.7                         | 25              | 0.492                | 0.743             | 0.854 ± 0.086                     |
| R187   | 0.3                    | F   | 24.9                         | 25              | 0.622                | 0.939             |                                   |
| R188   | 0.3                    | F   | 23.9                         | 25              | 0.596                | 0.901             |                                   |
| R189   | 0.9                    | F   | 2.34                         | 800             | 1.87                 | 2.83              |                                   |
| R190   | 0.9                    | F   | 2.44                         | 800             | 1.95                 | 2.95              | 3.62 ± 0.91                       |
| R191   | 0.9                    | F   | 3.95                         | 800             | 3.16                 | 4.77              |                                   |
| R192   | 0.9                    | F   | 3.25                         | 800             | 2.60                 | 3.93              |                                   |
| R193   | 2.3                    | F   | 7.13                         | 800             | 5.70                 | 8.62              |                                   |
| R194   | 2.3                    | F   | 5.40                         | 800             | 4.32                 | 6.53              | 8.92 ± 2.36                       |
| R195   | 2.3                    | F   | 6.92                         | 800             | 5.54                 | 8.36              |                                   |
| R196   | 2.3                    | F   | 10.1                         | 800             | 8.06                 | 12.2              |                                   |
| R197   | 6.3                    | F   | 42.4                         | 800             | 33.9                 | 51.2              |                                   |
| R198   | 6.3                    | F   | 39.5                         | 800             | 31.6                 | 47.8              | 52.6 ± 14.3                       |
| R199   | 6.3                    | F   | 32.0                         | 800             | 25.6                 | 38.7              |                                   |
| R200   | 6.3                    | F   | 60.1                         | 800             | 48.0                 | 72.6              |                                   |
| R201   | 17                     | F   | 116                          | 1600            | 200                  | 302               |                                   |
| R202   | 17                     | F   | 94.6                         | 1600            | 160                  | 241               | 278 ± 28                          |
| R203   | 17                     | F   | 102                          | 1600            | 181                  | 273               |                                   |
| R204   | 17                     | F   | 123                          | 1600            | 196                  | 296               |                                   |



## Supporting Information

**Table S16.** Individual HFPO-TeA liver (wet weight; ww) and liver extract concentrations for all rats after 5 days of exposure. < LOQ = sample concentration was below the LOQ (0.99 ng/mg ww or 1.58 µM) N/A = not applicable due to data being below the LOQ.

| Rat ID | Dose Level (mg/kg/day) | Sex | Liver Extract Conc. (ng/mL) | Dilution Factor | Liver Conc. (ng/mg) | Liver Conc. (µM) | Avg. ± St. Dev. Liver Conc. (µM) |
|--------|------------------------|-----|-----------------------------|-----------------|---------------------|------------------|----------------------------------|
| R145   | 0                      | M   | ND                          | 1               | < LOQ               | < LOQ            |                                  |
| R146   | 0                      | M   | ND                          | 1               | < LOQ               | < LOQ            |                                  |
| R147   | 0                      | M   | ND                          | 1               | < LOQ               | < LOQ            | N/A                              |
| R148   | 0                      | M   | ND                          | 1               | < LOQ               | < LOQ            |                                  |
| R149   | 0.3                    | M   | 35.5                        | 1               | 1.85                | 2950             |                                  |
| R150   | 0.3                    | M   | 138                         | 1               | 6.84                | 10,900           | 6070 ± 3410                      |
| R151   | 0.3                    | M   | 71.6                        | 1               | 3.28                | 5240             |                                  |
| R152   | 0.3                    | M   | 57.0                        | 1               | 3.23                | 5160             |                                  |
| R153   | 0.9                    | M   | 60.4                        | 2               | 3.10                | 4950             |                                  |
| R154   | 0.9                    | M   | 109                         | 2               | 5.32                | 8500             | 9060 ± 3170                      |
| R155   | 0.9                    | M   | 125                         | 2               | 6.52                | 10,400           |                                  |
| R156   | 0.9                    | M   | 159                         | 2               | 7.76                | 12,400           |                                  |
| R157   | 2.3                    | M   | 82.5                        | 2               | 4.09                | 6530             |                                  |
| R158   | 2.3                    | M   | 98.5                        | 2               | 4.65                | 7430             | 10,300 ± 7530                    |
| R159   | 2.3                    | M   | 70.3                        | 2               | 3.64                | 5810             |                                  |
| R160   | 2.3                    | M   | 282                         | 5               | 13.5                | 21,600           |                                  |
| R161   | 6.3                    | M   | 1130                        | 20              | 61.6                | 98,400           |                                  |
| R162   | 6.3                    | M   | 1100                        | 20              | 48.9                | 78,100           | 82,700 ± 10,500                  |
| R163   | 6.3                    | M   | 937                         | 1               | 48.1                | 76,800           |                                  |
| R164   | 6.3                    | M   | 1050                        | 1               | 48.5                | 77,400           |                                  |
| R165   | 17                     | M   | 2340                        | 30              | 109                 | 174,000          |                                  |
| R166   | 17                     | M   | 1360                        | 30              | 80.8                | 129,000          | 210,000 ± 84,900                 |
| R167   | 17                     | M   | 2200                        | 3               | 132                 | 211,000          |                                  |
| R168   | 17                     | M   | 4030                        | 3               | 205                 | 327,000          |                                  |
| R181   | 0                      | F   | ND                          | 1               | < LOQ               | < LOQ            |                                  |
| R182   | 0                      | F   | ND                          | 1               | < LOQ               | < LOQ            |                                  |
| R183   | 0                      | F   | ND                          | 1               | < LOQ               | < LOQ            | N/A                              |
| R184   | 0                      | F   | ND                          | 1               | < LOQ               | < LOQ            |                                  |
| R185   | 0.3                    | F   | 83.2                        | 1               | 4.09                | 6530             |                                  |
| R186   | 0.3                    | F   | 130                         | 1               | 6.67                | 10,700           | 6380 ± 3140                      |
| R187   | 0.3                    | F   | 69.7                        | 1               | 3.13                | 5060             |                                  |
| R188   | 0.3                    | F   | 33.3                        | 1               | 2.06                | 3290             |                                  |
| R189   | 0.9                    | F   | 171                         | 1               | 9.24                | 14,800           |                                  |
| R190   | 0.9                    | F   | 123                         | 2               | 6.65                | 10,600           | 14,000 ± 4280                    |
| R191   | 0.9                    | F   | 121                         | 1               | 6.85                | 10,900           |                                  |
| R192   | 0.9                    | F   | 223                         | 1               | 12.4                | 19,800           |                                  |
| R193   | 2.3                    | F   | 427                         | 5               | 21.5                | 34,300           |                                  |
| R194   | 2.3                    | F   | 81.6                        | 2               | 3.65                | 5830             | 16,500 ± 12,600                  |
| R195   | 2.3                    | F   | 202                         | 5               | 9.93                | 15,900           |                                  |
| R196   | 2.3                    | F   | 111                         | 5               | 6.28                | 10,000           |                                  |
| R197   | 6.3                    | F   | 738                         | 20              | 42.2                | 67,400           |                                  |
| R198   | 6.3                    | F   | 1200                        | 1               | 69.2                | 110,000          | 86,700 ± 31,700                  |
| R199   | 6.3                    | F   | 695                         | 20              | 32.8                | 52,400           |                                  |
| R200   | 6.3                    | F   | 1376                        | 20              | 73.1                | 117,000          |                                  |
| R201   | 17                     | F   | 3600                        | 3               | 174                 | 278,000          |                                  |
| R202   | 17                     | F   | 2780                        | 3               | 160                 | 255,000          | 250,000 ± 39,300                 |
| R203   | 17                     | F   | 2429                        | 30              | 121                 | 193,000          |                                  |
| R204   | 17                     | F   | 3790                        | 3               | 172                 | 275,000          |                                  |

## Supporting Information

### References

1. Probst, R.J.; Lim, J.M.; Bird, D.N.; Pole, G.L.; Sato, A.K.; Claybaugh, J.R. Gender Differences in the Blood Volume of Conscious Sprague-Dawley Rats. *Journal of the American Association for Laboratory Animal Science* **2006**, *45*, 49-52.
2. Trudnowski, R.J.; Rodolfo, R.C. Specific Gravity of Blood and Plasma at 4 and 37 °C. *Clinical Chemistry* **1974**, *20*, 615-616, doi:10.1093/clinchem/20.5.615.
3. Kim, S.-J.; Heo, S.-H.; Lee, D.-S.; Hwang, I.G.; Lee, Y.-B.; Cho, H.-Y. Gender differences in pharmacokinetics and tissue distribution of 3 perfluoroalkyl and polyfluoroalkyl substances in rats. *Food and Chemical Toxicology* **2019**, *97*, 243-255, doi:10.1016/j.fct.2016.09.017.
4. Yi, S.; Yang, D.; Zhu, L.; Mabury, S.A. Significant Reductive Transformation of 6:2 Chlorinated Polyfluorooctane Ether Sulfonate to Form Hydrogen-Substituted Polyfluorooctane Ether Sulfonate and Their Toxicokinetics in Male Sprague-Dawley Rats. *Environmental Science & Technology* **2022**, *56*, 6123-6132, doi:10.1021/acs.est.1c00616.
5. Jia, Y.; Zhu, Y.; Xu, D.; Feng, X.; Yu, X.; Shan, G.; Zhu, L. Insights into the Competitive Mechanisms of Per- and Polyfluoroalkyl Substances Partition in Liver and Blood. *Environmental Science & Technology* **2022**, *56*, 6192-6200, doi:10.1021/acs.est.1c08493.
6. Lambert, J.-P.; Ivosev, G.; Couzens, A.L.; Larsen, B.; Taipale, M.; Lin, Z.-Y.; Zhong, Q.; Lindquist, S.; Vidal, M.; Aebersold, R.; et al. Mapping differential interactomes by affinity purification coupled with data independent mass spectrometry acquisition. *Nature Methods* **2013**, *10*, 1239-1245, doi:10.1038/nmeth.2702.
7. Yao, J.; Sheng, N.; Guo, Y.; Yeung, L.W.Y.; Dai, J.; Pan, Y. Nontargeted Identification and Temporal Trends of Per- and Polyfluoroalkyl Substances in a Fluorochemical Industrial Zone and Adjacent Taihu Lake. *Environmental Science & Technology* **2022**, *56*, 7986-7996, doi:10.1021/acs.est.2c00891.
8. Wetmore, B.A. Quantitative *in vitro*-to-*in vivo* extrapolation in a high-throughput environment. *Toxicology* **2015**, *332*, 94-101, doi:10.1016/j.tox.2014.05.012.
9. Wilkinson, G.R.; Shand, D.G. A physiological approach to hepatic drug clearance. *Clinical Pharmacology & Therapeutics* **1975**, *18*, 377-390, doi:10.1002/cpt1975184377.
